# Supplementary material for: The HIV capsid mimics karyopherin engagement of FG-nucleoporins
Source: PubMed Central journal article supplement (PMC10881392; doi:10.1038/s41586-023-06969-7), 2024-01-24
Supplement: 41586_2023_6969_MOESM1_ESM.pdf [file 41586_2023_6969_MOESM1_ESM.pdf]

## Supplementary information

---

# The HIV capsid mimics karyopherin engagement of FG-nucleoporins

---

In the format provided by the authors and unedited

# **The HIV capsid mimics karyopherin engagement of FG-nucleoporins**

Dickson, C.F.\* , Hertel, S.\* , Tuckwell, A., Li, N., Ruan, J., Al-Izzi, S.C., Ariotti, N., Sierceki, E., Gambin, Y., Morris, R.G., Towers, G.J., Böcking, T., Jacques, D.A.

\*Contributed equally to this work.

Corresponding author: DA Jacques.

Email: [d.jacques@unsw.edu.au](mailto:d.jacques@unsw.edu.au)

## **Table of Contents:**

**SI Figure 1** | In-gel fluorescence of cell-free expressed GFP-fusion proteins used for FFS.

**SI Figure 2** | Coomassie-stained SDS-PAGE images of recombinant proteins used in this study.

**SI Table 1** | Summary of studies reporting effects of Nup depletion on HIV infection and Nup: Capsid binding interactions.

**Supplemental References**

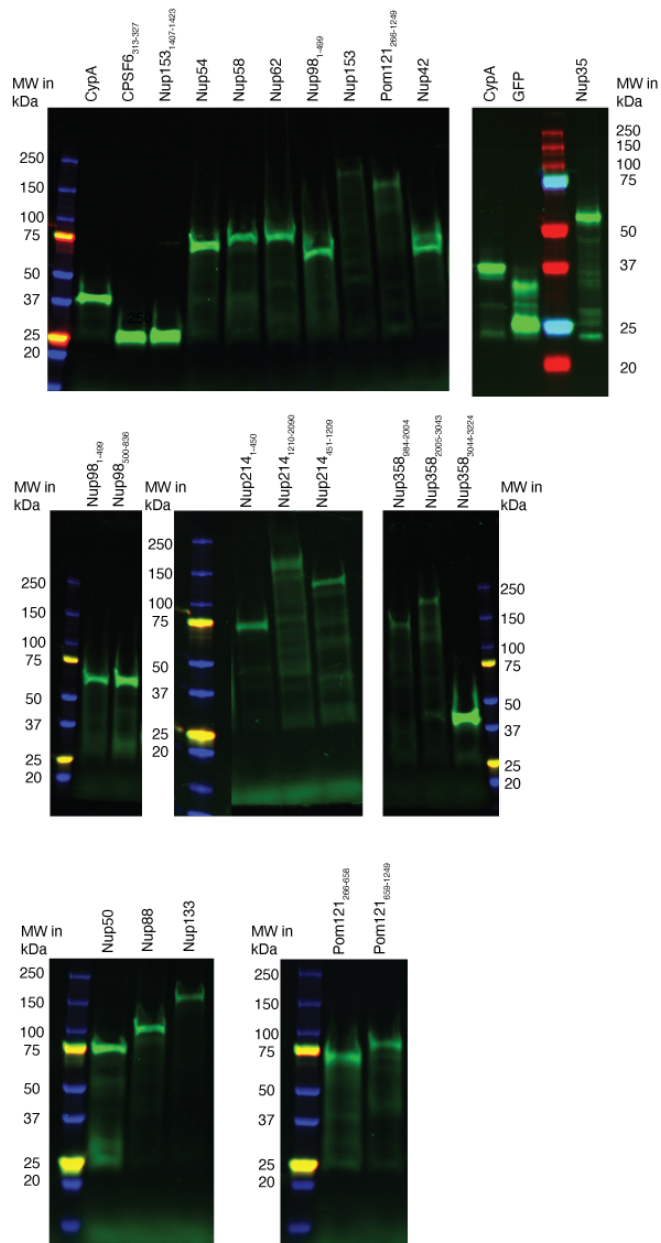

**Supplementary Figure 1:** In-gel fluorescence of cell-free expressed GFP-fusion proteins used for FFS.

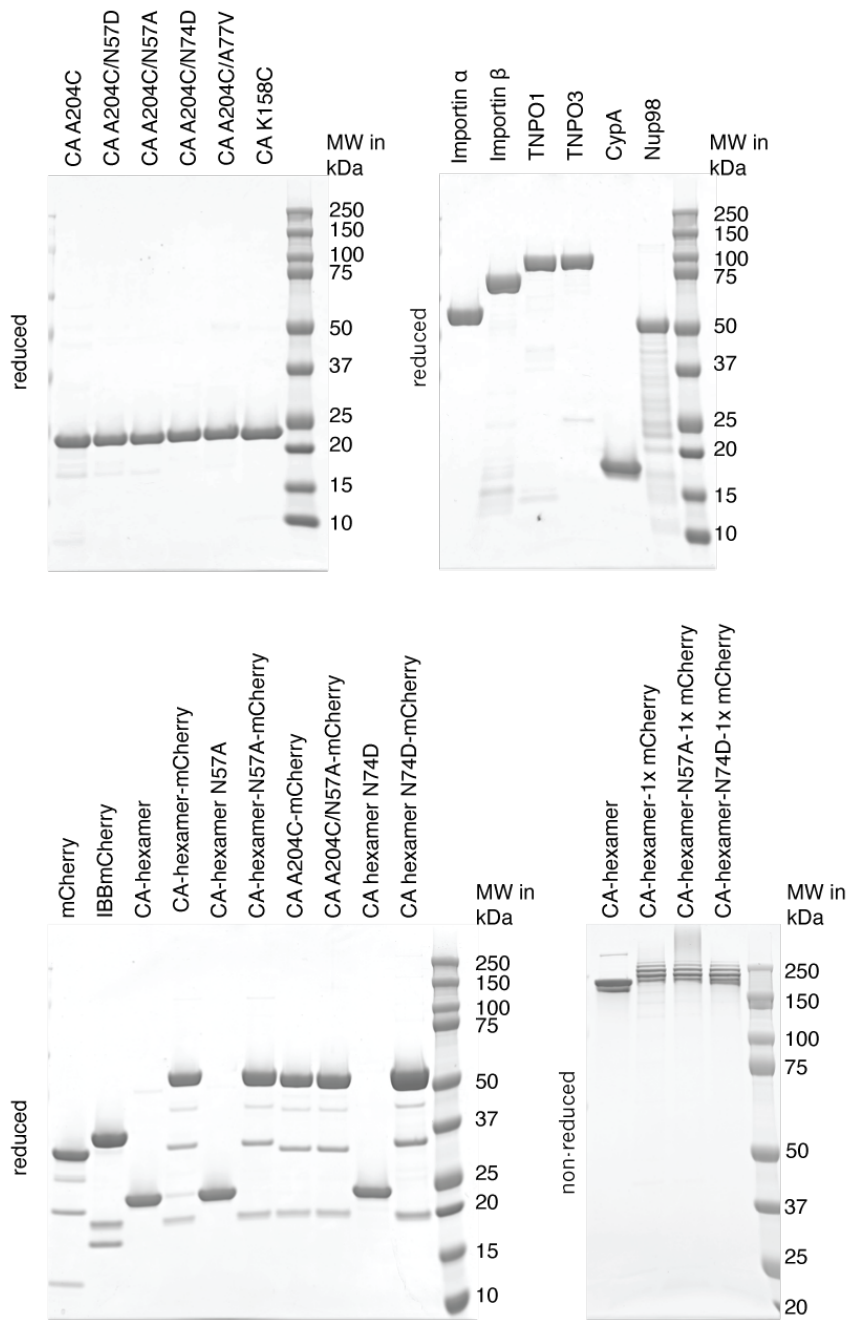

**Supplementary Figure 2:** Coomassie-stained SDS-PAGE images of recombinant proteins used in this study.

**Supplementary Table 1:** Summary of studies reporting effects of Nup depletion upon HIV infection, and identified Nup:Capsid binding interactions. **(1)** Reports of effects of Nup depletion on HIV infection compared to wild type cells. ‘Y’ indicates reported Nup depletion as having reduced infection levels (<2/3 WT), ‘N’ indicates no reported infection effects in genome wide studies or similar levels of infection (between 2/3 and 4/3 WT) for NPC wide studies, and ‘N\*’ indicates infection was increased (>4/3 WT). **(2)** Reports of Nup:Capsid binding interactions. Sub-columns indicate interactions with various capsids: ‘WT’ without known FG-binding mutations, with a mutation at residue N57 that reduce binding to known FG-binders, or a N74 mutation that reduce binding to CPSF6. ‘Y’ and ‘N’ indicate whether or not binding was reported to WT and ‘Y-’ or ‘Y+’ indicates whether a mutation increased or decreased binding. Blank cells indicate that Nup:Capsid interaction experiment for these conditions was not performed. ^ Saito *et al.* did not detect HIV cores binding to Pom12C but found a negative impact on HIV infection with overexpression of Pom121C<sub>612-987</sub> in multiple cell lines.

| 1. HIV Infection Impaired by Nup Depletion |      |                                                | FG-Repeat Nups |       |       |       |       |       |        |        |        |        | Non-FG Nups |       |        |
|--------------------------------------------|------|------------------------------------------------|----------------|-------|-------|-------|-------|-------|--------|--------|--------|--------|-------------|-------|--------|
| First author                               | Year | Experimental Method                            | Nup42          | Nup50 | Nup54 | Nup58 | Nup62 | Nup98 | Pom121 | Nup153 | Nup214 | Nup358 | Nup35       | Nup88 | Nup133 |
| Brass <i>et al.</i> <sup>34</sup>          | 2008 | Genome wide knock down in HeLa cells           | N              | N     | N     | N     | N     | N     | N      | Y      | N      | N      | N           | N     | Y      |
| König <i>et al.</i> <sup>35</sup>          | 2008 | Genome wide knock down in 293T cells           | N              | Y     | N     | N     | Y     | Y     | N      | Y      | Y      | N      | N           | N     | N      |
| Zhou <i>et al.</i> <sup>62</sup>           | 2008 | Genome wide knock down in HeLa cells           | N              | N     | N     | N     | N     | N     | N      | N      | N      | N      | N           | N     | N      |
| Yeung <i>et al.</i> <sup>63</sup>          | 2009 | Genome wide knock down in Jurkat cells         | N              | N     | N     | N     | N     | Y     | N      | N      | N      | N      | N           | N     | N      |
| Ebina <i>et al.</i> <sup>64</sup>          | 2004 | Targeted knock down in 293T cells              |                |       |       |       |       | Y     |        |        |        |        |             |       |        |
| Lee <i>et al.</i> <sup>21</sup>            | 2010 | Targeted knock down in HeLa cells              |                |       |       |       |       |       |        | Y      |        |        |             |       | N      |
| Matreyek <i>et al.</i> <sup>65</sup>       | 2011 | Targeted knock down in HeLa cells              |                |       |       |       |       |       |        | Y      |        |        |             |       |        |
| Di Nunzio <i>et al.</i> <sup>33</sup>      | 2012 | Targeted knock down in HeLa cells              |                |       |       |       |       | Y     |        | Y      | Y      | Y      |             |       |        |
| Ao <i>et al.</i> <sup>66</sup>             | 2012 | Targeted knock down in C8166/macrophages cells |                |       |       |       | Y     |       |        |        |        |        |             |       |        |
| Matreyek <i>et al.</i> <sup>15</sup>       | 2013 | Targeted knock down in HOS cells               |                |       |       |       |       |       |        | Y      |        |        |             |       |        |
| Di Nunzio <i>et al.</i> <sup>67</sup>      | 2013 | Targeted knock down in Jurkat cells            |                |       |       |       |       | Y     |        | Y      |        |        |             |       |        |
| Dharan <i>et al.</i> <sup>68</sup>         | 2016 | Targeted knock down in HeLa cells              |                |       |       |       |       |       |        |        |        | Y      |             |       |        |
| Guo <i>et al.</i> <sup>69</sup>            | 2018 | Targeted knock down in 293T/C8166 cells        |                |       |       |       |       |       | Y      |        |        |        |             |       |        |
| Buffone <i>et al.</i> <sup>20</sup>        | 2018 | Targeted knock down in HeLa cells              |                |       |       |       | Y     |       |        | Y      | Y      | Y      |             |       |        |
| Kane <i>et al.</i> <sup>19</sup>           | 2018 | NPC wide knock down in HeLa cells              |                | N     | N     |       | N     | Y     |        | Y      | Y      | Y      | N           | N     | N      |
| Xue <i>et al.</i> <sup>36</sup>            | 2023 | NPC wide knock down in HeLa cells              |                | Y     | N*    | N*    | N*    | Y     | Y      | Y      | N*     | Y      | Y           | N*    | Y      |

| 2. Nup:Capsid Binding Interactions       |      |                                                                                             | FG-Repeat Nups |       |       |       |       |       |        |        |        |        | Non-FG Nups |       |        |   |
|------------------------------------------|------|---------------------------------------------------------------------------------------------|----------------|-------|-------|-------|-------|-------|--------|--------|--------|--------|-------------|-------|--------|---|
| First author                             | Year | Experimental Method                                                                         | Nup42          | Nup50 | Nup54 | Nup58 | Nup62 | Nup98 | Pom121 | Nup153 | Nup214 | Nup358 | Nup35       | Nup88 | Nup133 |   |
| Schaller <i>et al.</i> <sup>6</sup>      | 2011 | Isothermal calorimetry of Nup358CypA domain and CA NTD                                      |                |       |       |       |       |       |        |        |        | Y      |             |       |        |   |
| Di Nunzio <i>et al.</i> <sup>33</sup>    | 2012 | Pull-downs from 293T cell lysate, <i>in vitro</i> HIV1 CA-NC complex                        |                |       |       |       |       |       |        |        |        | Y      |             |       |        |   |
| Di Nunzio <i>et al.</i> <sup>67</sup>    | 2013 | Pull-downs from 293T cell lysate, <i>in vitro</i> HIV1 CA-NC complex                        |                |       |       |       |       | Y     | Y-     | Y      | Y      |        |             |       |        |   |
| Matreyek <i>et al.</i> <sup>15</sup>     | 2013 | Pull-down from 293T cell lysate and recombinant Nup153C, <i>in vitro</i> HIV1 CA-NC complex |                |       |       |       |       |       |        | Y      | Y-     | Y+     |             |       |        |   |
| Bhattacharya <i>et al.</i> <sup>70</sup> | 2014 | Fluorescence anisotropy of fNup153 peptide and HIV-1 CA hexamers                            |                |       |       |       |       |       |        | Y      |        |        |             |       |        |   |
| Saito <i>et al.</i> <sup>37</sup>        | 2017 | Immunoprecipitation of HIV Cores with Pom121C                                               |                |       |       |       |       |       | N^     |        |        |        |             |       |        |   |
| Buffone <i>et al.</i> <sup>20</sup>      | 2018 | Pull-downs from 293T cell lysate, <i>in vitro</i> HIV1 CA-NC complex                        |                |       |       |       | Y     | Y-    | Y+     | Y      | Y-     | Y+     | Y           |       |        |   |
| Kane <i>et al.</i> <sup>19</sup>         | 2018 | Pull-downs from HeLa cell lysate, <i>in vitro</i> CA tubes                                  |                |       |       |       | Y     |       |        | Y      |        | Y      |             | Y     | N      |   |
| Shen <i>et al.</i> <sup>71</sup>         | 2023 | Co-pelleting of Recombinant Nup with <i>in vitro</i> CA tubes                               |                |       |       |       | Y     |       |        | Y      |        | Y      |             |       |        |   |
| Xue <i>et al.</i> <sup>36</sup>          | 2023 | Pull-downs from 293T cell lysate, <i>in vitro</i> HIV1 CA complex                           |                |       |       |       |       |       | Y      | Y      |        |        | Y           | Y     |        |   |
| This Study                               | 2023 | FFS of eukaryotic cell-free Nup expression, <i>in vitro</i> A204C stabilised CLPs           | Y              | Y-    | Y+    | N     | N     | Y     | Y-     | Y+     | Y      | Y-     | Y+          | Y     | Y      | Y |

## Supplementary References

62. Zhou, H. *et al.* Genome-scale RNAi screen for host factors required for HIV replication. *Cell Host Microbe* **4**, 495–504 (2008).
63. Yeung, M. L., Houzet, L., Yedavalli, V. S. R. K. & Jeang, K. T. A genome-wide short hairpin RNA screening of Jurkat T-cells for human proteins contributing to productive HIV-1 replication. *Journal of Biological Chemistry* **284**, 19463–19473 (2009).
64. Ebina, H., Aoki, J., Hatta, S., Yoshida, T. & Koyanagi, Y. Role of Nup98 in nuclear entry of human immunodeficiency virus type 1 cDNA. *Microbes Infect* **6**, 715–724 (2004).
65. Matreyek, K. A. & Engelman, A. The requirement for nucleoporin NUP153 during human immunodeficiency virus type 1 infection is determined by the viral capsid. *J Virol* **85**, 7818–7827 (2011).
66. Ao, Z. *et al.* Contribution of host nucleoporin 62 in HIV-1 integrase chromatin association and viral DNA integration. *Journal of Biological Chemistry* **287**, 10544–10555 (2012).
67. Di Nunzio, F. *et al.* Nup153 and Nup98 bind the HIV-1 core and contribute to the early steps of HIV-1 replication. *Virology* **440**, 8–18 (2013).
68. Dharan, A. *et al.* KIF5B and Nup358 cooperatively mediate the nuclear import of HIV-1 during infection. *PLoS Pathog* **12**, e1005700 (2016).
69. Guo, J. *et al.* The transmembrane nucleoporin Pom121 ensures efficient HIV-1 pre-integration complex nuclear import. *Virology* **521**, 169–174 (2018).
70. Bhattacharya, A. *et al.* Structural basis of HIV-1 capsid recognition by PF74 and CPSF6. *Proceedings of the National Academy of Sciences* **111**, 18625–18630 (2014).
71. Shen, Q. *et al.* Modeling HIV-1 nuclear entry with nucleoporin-gated DNA-origami channels. *Nat Struct Mol Biol* **30**, 425–435 (2023).
